# Supplementary material
Source: publisher site journal article supplement (https://www.dovepress.com/article/581228)
Supplement: Supplementary file 1 [file 581228_Supplementary%20Tables.docx]

# Supplementary Table 1 Potential applications of nanoparticles in AR

| Nanoparticles | Loaded Cargo | Size (nm) | Zeta potential (mV) | Study Design | Therapeutic schedule | Effects | Ref. |
| --- | --- | --- | --- | --- | --- | --- | --- |
| PLGA | MSC-exo with PPAR-γ agonists | 807.1 ± 4.01 | −12.7 ± 4.59 | ●In vitro: LPS, HNEpCs cell, RBL-2H3 cell  ●In Vivo: OVA, BALB/c mice, AR and asthma model | ●5 mg/well  ●5 mg/mouse, Intranasal administration | ●Restored Th1/Th2 balance  ●Alleviated symptoms; Restored Th1/Th2 balance | 50 |
| Mometasone Furoate | 117 ± 13 | −32 ± 1.2 | ●In vitro: Drug release studies | ●225 μg, 50 mL PBS | ●MF exhibited sustained release from NPs over 7 days | 51 |
| CpG and Der p2 | 300 ± 100 | – | ●In vitro: Release of CpG  ●In vivo: Der p2, C3H/HeBFeJ mice, asthma model | ●20 mg, 5 mL PBS  ●10 μg Der p2 and 5 μg CpG/mouse, Subcutaneous administration | ●Small-sized particles: release 100% CpG (1h); Medium and Large-sized particles: burst release followed by sustained release of CpG  ●Alleviated AHR; Induced Th1 immune responses | 52 |
| Liposomes | Mbd2 siRNA | – | – | ●In vivo: OVA, Mbd2flox/flox mice, allergic airway inflammation model | ●5 mg/mouse, Intranasal administration | ●Repressed M2 macrophage; Alleviated allergic airway inflammation | 53 |
| Liposomes | Der f 2 and Lewis X | 128.86 ± 1.30 | −11.7 ± 0.40 | ●In vitro: Co-culture of MoDCs incubated with Lex-lip-Der f 2 and naïve CD4⁺ T cells | ● 2 μg/ml | ●Targeted to DCs; Inhibited Th2 immune response | 54 |
| Chitosan | BCG-PSN-OVA | 1130 ± 22 | – | ●In Vivo: OVA, BALB/c mice,  Asthma model | ●Intraperitoneal injection | ●Attenuated AHR and airway inflammation | 55 |
| Nanomicelles | Curcumin | 11.23 ± 0.62 | −7.62 ± 0.13 | ●In vitro: RAW264.7 and Caco-2 cells, intracellular uptake assays;LPS+IFN-γ, inflammatory model  ●In vivo: Sprague Dawley rats, pharmacokinetic study; OVA, BALB/c mice, asthma model | ●5 μM  ●60 mg/kg,[administered](dic://administered%20intragastrically) intragastrically; 20 mg/kg, administered intragastrically | ●Enhanced curcumin uptake in cells; Anti-inflammatory  ●Increased oral bioavailability; Reduced AHR and inflammation | 56 |
| Nanomicelles | OVA and celastrol | 50.72 ± 0.98 | – | ●In vivo: OVA, BALB/c mice, asthma model | ●10 μg OVA+200 μg NMs+10 μg celastrol/mouse, subcutaneously administration | ●Decreased the IgE/IgG2a ratio; Decreased Th2 inflammation; | 57 |
| MSC-sEVs | miR-146a-5p | 100~150 | – | ●In vitro: rhIL-2, rhIL-25, rhIL-33, Functional Suppression Assay of ILC2s in PBMCs from AR patients; ILC2s, uptake assay  ●In vivo: IL-33, C57BL/6 mice, ILC2-dominant allergic airway inflammation model | ●5 μg/mL or 40 μg/ mL; 40 μg/mL  ●2×1010, Intravenous injection | ●Reduced IL-5 and IL-13 levels; ILC2s internalized MSC-sEVs  ●Prevented ILC2-dominant allergic airway inflammation | 58 |
| hMSC-EVs | – | – | – | ●In vivo: Aspergillus Hyphal Extract, C57Bl/6 mice, allergic airway inflammation | ●3×10⁶ cells, Tail vein injection | ●Reduced AHR and pulmonary inflammation | 59 |
| hADSC-EVs | – | 100 | – | ●In vivo: OVA, BALB/c mice, AR model | ●0.5×106 cells, Tail vein injection | ●Corrected Th1/Th2 imbalance | 60 |
| AD-MSCs-EVs | – | – | – | ●In vivo: OVA, C57BL/6 mice, airway inflammation model | ●1×105 cells, Jugular injection | ●Alleviated inflammation | 61 |
| Nasal EVs | – | – | – | ●In vivo: Clinical Model for Patients with AR | – | ●Identification of differences in Nasal EV Microbiome Diversity | 62 |
| Plasma EVs | – | – | – | ●In vivo: Clinical Model for Patients with AR | – | ●Identification of miR-150-5p-regulated genes | 63 |
| Chimeric HBc VLPs | C. Che a 3 peptide | – | – | ●In vivo: rChe a 3, BALB/c mice, immunization model | ●10 μg/mouse, Subcutaneous injection | ●Induced Th1 immune response | 64 |
| AuNPs | – | 6.3 | -35.0 ± 1.0 | ●In vivo: OVA, A/J mice, chronic asthma model | ●0.4 μg/mL, 4 μg/mL Nebulized administration | ●Improved airway hyperresponsiveness, mucus secretion, and collagen deposition around the airways | 79 |
| AuNPs | Yb-Bi₂S₃ | – | – | – | – | ●Detection of miRNA-155 | 80 |
| Silver nanoparticles | – | 20~25 | – | ●In vitro: Human mast cell line-1 | ●0.01–10 μg/ml | ●Inhibited IL-6, IL-1β, and TNF-α levels | 81 |
| Copper oxide nanoparticles | – | – | – | ●In vivo: OVA, Swiss albino mice, AR model | ●10– 20 mg/kg | ●Alleviated allergic symptoms | 82 |
| Silica nanoparticles | Budesonide | 56900 ± 38 | −30.07 converted to 5.94 | ●In vitro: Simulated AR environment (pH 5.0, 35 ◦C); In Vitro Adhesion Assay | – | ●Adsorbed mucin; pH-responsive release performance | 83 |
| Aluminum oxide nanoparticles | Vasoactive intestinal peptide | 80 ± 5 | – | ●In vivo: OVA, Balb/c mice, airway inflammation model | ●10 mg/ml, Nebulized inhalation administration | ●Reduced Th2 cytokines and AHR | 84 |
| Aluminum oxide nanoparticles | HP-NAP and MapA | 130 ± 25 | – | ●In vivo: OVA, Balb/c mice, AR model | ●Nebulized inhalation administration | ●Reduced Th2 immune responses | 85 |
| PEGDA hydrogel | Mometasone furoate | 20 – 50 | – | ●In vivo: OVA, Wistar albino rats, AR model | ●10 μg/rat, Intranasally administered | ●Enhanced therapeutic outcomes for AR | 95 |
| In Situ Hydrogel | Triphala | 137.6 ± 1.9 | −22.73 ± 0.23 | ●In vitro: LPS, RAW264.7 cells, inflammatory model | ●62.5 –8000 μg/mL | ●Reduced the levels of NO | 96 |
| Nitric oxide releasing hydrogel nanoparticles | – | 306 ± 14 ~ 393 ± 10 | – | ●In-vitro: Bubble exposure, CCL-149 cell, airway reopening model | ●5 mg/ml | ●Reduced damage to the airway epithelium; Decreased levels of IL-6 and CCL2 | 97 |

Note: Mbd2: Methyl-CpG-binding domain 2; Lewis X: Lewis-type blood antigens; MoDCs: Monocyte-derived DCs; Lex-lip-Der f 2: Dermatophagoides farinae (Der f 2)-loaded Lewis X conjugated liposomes; DCs: Dendritic cells. BCG-PSN: Bacillus Calmette-Guerin polysaccharide nucleic acid; OVA: ovalbumin; PLGA: Poly(lactic-co-glycolic acid); MSC-exo: Mesenchymal stem cells-derived exosomes; LPS: Lipopolysaccharide; PBS: phosphate-buffered saline; AHR: Airway hyperresponsiveness; MSC-sEVs: Mesenchymal stromal cells- Extracellular vesicles; AHR: Airway hyperresponsiveness; hADSC-EVs: human bone marrow-derived MSCs-EVs; AD-MSCs EVs: Adipose tissue-derived mesenchymal stromal cells-EVs; HP-NAP: Helicobacter pylori neutrophil-activating protein; MapA: Mucus adhesion promoting protein.

# Supplementary Table 2 Passive targeted delivery of nanodrug in AR

|  | Loaded Cargo | Nanoparticles | Size (nm) | Zeta potential (mV) | Study Design | Therapeutic schedule | Effect | Ref. |
| --- | --- | --- | --- | --- | --- | --- | --- | --- |
| Glucocorticoids | Dexamethasone | PLGA, Hydrogels | 124 ± 11 | −10.6 ± 5.7 | ●In Vitro: RPMI 2650 cells, MTT assay; Release studies | ●12.5% PLGA- dexamethasone | ●Non-toxic, 80% cumulative drug release within 30 days | 108 |
| Fluticasone Propionate | FP-ZNPs | 300.6 ± 32.9 | −32.6 ± 2.3 | ●In vivo: Acetic acid, albino rats, AR model | 50 μg /dose, Intranasal administration | ●Inhibited MMP9 expression | 109 |
| Antihistamine | Diphenhydramine | Nano-gel and nano-emulsified gel | – | – | ●In vivo: New Zealand white male rabbits, Allergenic model | ●5 mg/dose, Intranasal administration | ●Improved damage to the nasal mucosa | 110 |
| Cetirizine (containing ketotifen) | Hydroxybutyl chitosan NPs | 103.51 | 13.97 | ●In vivo: OVA, Wistar Rat, | ●500 μg/kg, 1000 μg/kg, Intranasal administration | ●Ameliorated histamine mediated AR inflammation | 111 |
| Loratadine | Chitosan-coated liposomes | 0.05%: 345 ± 4.6  0.1%: 438 ± 7.3 | – | ●Ex vivo: Porcine gastric mucin adsorption experiment | – | ●Mucin adsorption | 112 |
| Loratadine, Sulpiride | Nanoemulsion | 85.2 ± 0.2 | -23.3 ± 0.2 | ●In vivo: OVA, AR model in Rabbits | ●17μg of the loratadine and 7 μg of sulpiride/dose, Intranasal administration | ●Reduced levels of TNF-α, IL-1, and TGF-β | 113 |
| Plant-derived extracts | The oil of Fructus Xanthii and Magnolia liliiflora | Liposome in situ gel | 200.4 ± 4.06 | +32 | ●In vivo: OVA, C57BL/6J mice, AR model | ●Intranasal administration | ●Alleviated inflammatory infiltration and the nasal mucosa damage | 117 |
| Epigallocatechin-3-gallate | Thiolated chitosan NPs | 24.6 ± 3.3 | -5.89 ± 0.22 | ●In vivo: OVA, BALB/c mice, AR mode | ●13 mg/kg, Intranasal administration | ●Corrected the Th1/Th2 imbalance | 118 |
| Quercetin | Chitosan NPs | 229.2 ± 0.2 | 23.6 ± 0.2 | ●In vitro: Drug Release Experiment  ●In vivo: OVA, BALB/c mice | ●10 mg, 3 mL PBS  ●–, Intranasal administration | ●Drug release rate: 90% (24h); excellent stability maintained (＞7 days)  ●Corrected Th1/Th2 imbalance | 119 |
| Curcumin and OVA | PLGA | 213.8 ± 34.99  203.7 ± 37.34 | −52.6 ± 9.483  −48.74 ± 5.653 | ●In vivo: OVA, BALB/c mice, AR model | ●Co-formulations with PLGA at ratios of 1:1 and 1:2 (OVA at 5 μg), Sublingual immunotherapy | ●Corrected Th1/Th2 imbalance | 120 |
| SQ21 and SQ22 | PLGA/PVA Hybrid NPs | 60.15 ± 1.4;  60.68 ± 1;  62.96 ± 0.7 | – | ●In vitro: Human stem cell factor, Human Mast Cell Line LAD2, Inflammation Model | ●NPs loaded with 12.5, 25, and 50 μM of sesquiterpenes | ●Regulated the levels of mast cell surface receptors FcεR1α/β/γ and stem cell factor receptor Kit | 121 |
| Vitamins A and Vitamins E | Liposome | 25 ~ 1000 | – | ●In vivo: Clinical Trial for AR Patients | ●[1.000% p/p (100 g)] vitamin A [0.058% p/p (100 g)] and vitamin E [0.018 % p/p (100 g)], Intranasal administration | ●Lowered the proportion of eosinophils, mast cells, and neutrophils  . | 122,123 |
| Ginger extract | Modified liposomes | 135 ± 9 | −28 ± 2 | ●In vitro: Hydrogen peroxide, HaCaT cells, Oxidative damage model | ●0.3 μg/mL and 3 μg/mL | ●Anti-inflammatory; Antioxidant | 124 |
| Allergen | C. Che a 3 peptide | Chimeric HBc VLPs | – | – | ●In vivo: rChe a 3, BALB/c mice, immunization model | ●25 μg of C. Che a 3 peptide and 10 μg of chimeric HBc VLP /50μl, Subcutaneous injection | ●Blocked the binding of IgE to rChe a 3; Corrected Th1/Th2 immune imbalance | 64 |
| OVA and CpG DNA | Extracellular vesicles | 90 | −32 | ●In vivo: OVA, BALB/c mice, AR model | ●10 μg/dose, Intranasal administration | ●Corrected Th1/Th2 immune imbalance | 135 |
| EVs | MSC-EVs | Hydrogel | 10 ~ 100 | – | ●In vivo: OVA, BALB/c mice, AR model | ●20 μg/mL hEVs, Intranasal administration | ●Corrected Th1/Th2 immune imbalance | 137 |
| MSC-EVs | – | 125 | – | ●In vivo: OVA, BALB/c mice, AR model | ●100 μg/mice, Intranasal administration | ●Restored the claudin-1 expression, Enhanced nasal mucosal barrier function | 138 |
| EVs-derived from human adipose stem cells | – | – | – | ●In vivo: OVA, BALB/c mice, AR model | ●0.5×106 cell secretions, Intranasal administration | ●Alleviated inflammatory infiltration and Th1/Th2 imbalance | 139 |
| iPSC-MSC-sEV | – | 150 | – | ●In vitro: Experiment on DC Phagocytic Capacity; Co-cultured sEV-mDCs with CD4+T cells or PBMCs from AR patients | ●5 or20 μg/mL MSC-sEV; 5 μg/mL | ●MSC-sEV enhanced antigen uptake capacity in mDCs; Suppressed pathological Th2 responses | 140 |
| BMSC-EVs | Thermosensitive chitosan Hydrogel | 50 ~ 200 | – | ●In vivo: OVA, BALB/c mice, AR model | ●5 μg/ml, Intranasal administration | ●Regulated Th1/Th2 and Treg/Th17 immune balance | 141 |
| MSC-derived exosomes | PLGA | 1073.9  852.7  480.8  250.1 | −19.8 ± 3.53  −15.6 ± 1.35  −14.2 ± 2.97  −9.4 ± 3.21 | ●In vitro: LPS, HNEpCs  ●In vivo: OVA, BALB/c mice, AR | ●5mg/well  ●10 μg/mg, Intranasal administration | Regulated Th1/Th2 balance | 142 |
| Genes | miR-146a-5p | Human MSC-derived sEVs- | 100 ~ 150 | – | ●In vitro: rhIL-2, rhIL-25, rhIL-33, Functional Suppression Assay of ILC2s in PBMCs from AR patients; ILC2s, uptake assay  ●In vivo: IL-33, C57BL/6 mice, ILC2-dominant allergic airway inflammation model | ●5 μg/mL or 40 μg/ mL; 40 μg/mL  ●2×1010 cells, Intravenous injection | ●Reduced IL-5 and IL-13 levels; ILC2s internalized MSC-sEVs  ●Prevented ILC2-dominant allergic airway inflammation | 58 |
| miR-146a-5p | Nasal epithelial cell-derived EVs | – | 40 ~ 150 | ●In vitro: Th2 cells co-cultured with EVs | ●50 nM | ●Modulated Smad3/GATA-3 pathway; Promoted Th1 differentiation and suppressed Th2 differentiation | 145 |
| miRNA-146a | PEG-PLA-Doped Chitosan Hydrogel | 551.5 ± 53.2 | −22.6 ± 1.3 | ●In vitro: Release experiment, dialysis bag method  ●Ex vivo: Nasal mucosa, penetration experiment  ●In vivo: OVA, Sprague Dawley rats, AR model | ●PEG-PLA NPs containing Cy3-labeled miRNA, 1 mL of PBS  ●–  ●1.4 × 10−3 mg/rat, Intranasal administration | ●Sustained release  ●Highest mucosal retention rate (51%)  ●Regulated Th1/Th2 immune balance | 101 |
| Others | Monascin | PLGA | 305.3 | −12.5 | ●In vitro: RBL-2H3 cells, Cell Viability Assay  ●In vivo: OVA, Balb/c mice, AR model | ●10, 50, 100μg  ●–, Intranasal administration | ●Survival rate >80%  ●Reduced inflammatory infiltration in nasal tissue and secretion of IgE, histamine | 147 |

Note: FP-ZNPs: Fluticasone propionate zein nanoparticles; MMP9: Matrix metallopeptidase 9; SQ21: Bicyclic sesquiterpenes fukinone; SQ22: 10βH-8α,12-epidioxyeremophil-7(11)-en-8β-ol; CpG: Cytosine-phosphate-guanine; MSC-EVs: Mesenchymal stem cells-extracellular vesicles; iPSC-MSC-sEV: induced pluripotent stem cells-MSC-sEV; PBMCs: Peripheral blood mononuclear cells; BMSC-EVs: Bone marrow-derived MSC-EVs.

# Supplementary Table 3 Active targeted delivery of nanodrug in AR

| Targeting | Modification | Targets | Drug | Platform | Size (nm) | Zeta potential (mV) | Study Design | Therapeutic schedule | Effect | Ref. |
| --- | --- | --- | --- | --- | --- | --- | --- | --- | --- | --- |
| DCs | NGR | CD13 | Shikonin | PEG-PLGA micelles | 19.38 ± 0.02 | −3.48 ± 0.67 | ●In vitro: BM-DCs, Cellular uptake  ●In vivo: OVA, C57BL/6J mice, AR model | ●5 μg/ml  ●-, Intranasal administration | ●NGR modification enhanced the endocytosis of PM by DCs.  ●Improved AR symptoms and correct Th1/Th2 imbalance | 150 |
| NGR | CD13 | Xanthatin | Polymeric micelles | 17.83 ± 0.28 | −6.01 ± 0.96 | ●In vitro: BM-DCs, Screening and identifying DCs-specific targeting system  ●In vivo: OVA, C57BL/6J mice, AR model | ●0%, 2.5%, 5% and 7.5%  ●Contain 0.4 mg/kg Xanthatin, Intranasal administration | ●Ligand modification enhanced DCs binding  ●Inhibited DC maturation;  Regulate the Th1/Th2 immune balance | 151 |
| P-D2 peptide | CD11c | – | MSCs-derived EVs | 107.82 ± 2.39 | −16.01 ± 2.08 | ●In vivo: OVA, BALB/c mice, AR model | ●250μg/mouse, Intranasal administration | ●Inhibited the Fut1/ICAM1/P38MAPK signaling pathway; Modulated DC function; Alleviated AR symptoms | 153 |
| DC-specific aptamer | DCs | Platanus orientalis pollen total extract | AuNPs | 17.6 ± 4 | −18.2 ± 2.1 | ●In vivo: Pla.ext, BALB/c mice, AR model | ●Pla.ext (10μg, 50μg, 100μg)-GNPs/mouse, Epicutaneous immunotherapy | ●Allergic inflammation and histopathological damage were significantly reduced. | 154 |
| DC-specific aptamer | DCs | OVA | PLGA NPs | 234.5 ± 43.9 | – | ●In vivo: OVA, BALB/c mice, AR model | ●OVA-encapsulated PLGA NPs containing 10 and 5 μg of OVA per dose, Sublingual immunotherapy | ●Promoted DC uptake; Alleviated AR symptoms in mice | 155 |
| DC-specific aptamer | DCs | OVA | MSC-derived exosomes | 114.1 ± 11.6 | −69 ± 7.3 | ●In vivo: OVA, BALB/c mice, Allergic model | ●Exo-OVA-Apt (containing 5µg/dose of OVA), Sublingual application | ●Reduced number of eosinophils in the NALF | 156 |
| DC-specific aptamer | DCs | rChe a 2 | AuNPs | 14.9 | −27.4 | ●In vivo: rChe a 2, BALB/c mice, AR model | ●rChe a 2-GNPs-Apt (containing 10, 5 and 2.5 µg/dose of rChe a 2 allergen) Epidermal Immunotherapy | ●Suppressed IgE production and eosinophil infiltration | 157 |
| DC-specific aptamer | DCs | OVA | AuNPs | 14.9 | −27.4 | ●In vivo: OVA, BALB/c mice, Allergic model | ●AuNP-Apt-OVA (containing 5μg/dose OVA), Sublingual administration | ●Enhanced the immunoregulatory responses of Th1 and Treg cells; Alleviated AR and airway inflammation | 158 |
| D-mannose | CD206 | OVA | PLGA NPs | 220.5 ± 13.3 | −19.8 | ●In vivo: OVA, BALB/c mice, Allergic model | ●Man-Ova-PLGA NPs (10, 5μg OVA), Apt-Ova-PLGA NPs(10μg), Ova-PLGA NP (10,5μg OVA), Sublingual immunotherapy | ●Reduced allergen doses and enhanced the immunomodulatory effects of SLIT. | 159 |
| Mast Cells | Ceramide | CD300f | – | Liposome | – | – | ●In vitro: BMMCs, Cellular uptake  ●In vivo: ragweed pollen, C57BL/6J mice AR model | ●10 mg/mL  ●2 μg/dose, Intranasal administration | ●Inhibited mast cell degranulation  ●Reduced degranulation of mast cells and the number of eosinophils in nasal tissue and sneezing. | 162 |
| IgE aptamer | IgE | Cromoglycate sodium | Silica nanocarrier | 143.6 | −7.4 ± 0.06 | ●In vitro: Mast cell, Cellular uptake  ●In vivo: OVA, BALB/c mice, AR model | ●40 μg/mL  ●100 μg/mL, Intraperitoneal injection | ●Enhanced NPs uptake in sensitized mast cell  ●Reduced eosinophil infiltration; Extended the treatment window | 163 |
| Eosinophils | CCR3 antagonistic peptide | CCR3 | Fumaric Acid Ketotifen | PVA polymer | 111.3 | −9.01 | ●In Vivo: OVA, Wistar rats, AR model, | ●1 mg/mL, Intranasal administration | ●Deep penetration with long-term retention; Inhibited mast cell degranulation and eosinophil chemotaxis | 165 |
| Tregs | MHC-II | TCR | OVA and FLLL31 | Dendritic cell-derived EVs | – | – | ●In Vivo: OVA, BALB/c mice, AR model | ●5mg/ml. Intranasal administration | Specifically recognized T cells and induced the production of Tregs and IL-10; Suppressed Th2-type immune responses | 167 |

Note:DCs: Dendritic cells; BM-DCs: Dendritic cells from mouse bone marrow; NGR: Asn–Gly–Arg; PM: PEG-PLGA micelles; Apt: Aptamers; BMMCs: bone marrow-derived mast cells.
